# Supplementary material for: Role of polyoxometalate precursors and supports in the selective oxidation of methane into formaldehyde using supported metal oxide subnanocluster catalysts
Source: Royal Society of Chemistry journal article supplement (doi:10.1039/d3cy00750b), 2023-01-01
Supplement: d3cy00750b1.pdf [file d3cy00750b1.pdf]

*Supplementary Material for*

**Role of polyoxometalate precursors and supports in the selective oxidation of methane into formaldehyde using supported metal oxide subnanocluster catalysts**

Keiju Wachi, Tomohiro Yabe<sup>\*</sup>, Takaaki Suzuki, Kentaro Yonesato, Kosuke Suzuki,

Kazuya Yamaguchi<sup>\*</sup>

Department of Applied Chemistry, School of Engineering, The University of Tokyo, 7-3-1 Hongo,  
Bunkyo-ku, Tokyo 113-8656, Japan

<sup>\*</sup>E-mail: kyama@appchem.t.u-tokyo.ac.jp; tyabe@g.ecc.u-tokyo.ac.jp

**This pdf file includes:**

Experimental Methods

Supporting Tables: Table S1–S2

Supporting Figures: Fig. S1–S7

References: S1–S5

## Experimental Methods

**XAS Measurements.** The data reduction procedure for EXAFS consisted briefly of the following steps: pre-edge subtraction, background determination, normalization, and spectra averaging. The edge position is defined to be the first inflexion point on the leading absorption peak. The energy was calibrated using Fe foil for the Fe K-edge XAS. The background in the EXAFS region was approximated using a cubic spline routine and optimized according to the criteria described by Cook and Sayers.<sup>S1</sup> Then, the spectra were normalized by the edge-step at 50 eV after the absorption edge. The  $k^3$ -weighted EXAFS functions were Fourier transformed, filtered, and fitted in  $R$ -space. Fourier filtering was used to isolate the contributions of specific shells and to eliminate low frequency background and high frequency noise. Fourier filtering was done by choosing a window in the Fourier transform spectrum and calculating the inverse Fourier Transform of the selected  $R$ -range.

## Supporting Tables

Table S1 The iron contents of supported iron catalysts

| Catalyst                     | Fe [wt%] |
|------------------------------|----------|
| <b>Fe2/SiO<sub>2</sub></b>   | 0.17     |
| <b>Fe1/SiO<sub>2</sub></b>   | 0.16     |
| <b>Fe4/SiO<sub>2</sub></b>   | 0.63     |
| <b>35Fe2/SiO<sub>2</sub></b> | 0.62     |

Table S2 The list of peaks of observed DRIFTS spectra on SiO<sub>2</sub> and Al<sub>2</sub>O<sub>3</sub>, and the peak attribution

| Wavenumber [cm <sup>-1</sup> ]       |                                           |                                                         |
|--------------------------------------|-------------------------------------------|---------------------------------------------------------|
| SiO <sub>2</sub> , 600 °C            | Al <sub>2</sub> O <sub>3</sub> , 600 °C   | Methanol <sup>S2</sup>                                  |
| 3736                                 | 3751                                      | 3370, $\nu(\text{OH})$                                  |
| 3540                                 | 2997                                      | 3003, $\nu(\text{CH})$                                  |
| 2959                                 | 2906                                      | 2977, $\nu(\text{CH})$                                  |
| 2858                                 | 1630                                      | 2956, $\nu(\text{CH})$                                  |
|                                      | 1572                                      | 2921, $\nu(\text{CH})$                                  |
|                                      |                                           | 2848, $\nu(\text{CH})$                                  |
| Formaldehyde <sup>S4</sup>           | Polyoxymethylene <sup>S4</sup>            | Carbon monoxide                                         |
| 3430                                 | 2980, $\nu(\text{CH}_2)$                  | 2000–2200, $\nu(\text{CO})$                             |
| 2995                                 | 2915, $\nu(\text{CH}_2)$                  |                                                         |
| 2894, $\nu_{\text{as}}(\text{CH}_2)$ |                                           |                                                         |
| 2830, $\nu_{\text{s}}(\text{CH}_2)$  |                                           |                                                         |
| 2732                                 |                                           |                                                         |
| 1725, $\nu(\text{CO})$               |                                           |                                                         |
| 1717, $\nu(\text{CO})$               |                                           |                                                         |
| 1501, $\delta(\text{CH}_2)$          |                                           |                                                         |
| Methoxide <sup>S3</sup>              | Dioxymethylene <sup>S4</sup>              | Formate <sup>S4</sup>                                   |
| 2928, $\nu_{\text{as}}(\text{OH})$   | 2950–2970, $\nu_{\text{as}}(\text{CH}_2)$ | 2970, $\nu_{\text{as}}(\text{OCO}) + \delta(\text{CH})$ |
| 2832, $\nu_{\text{s}}(\text{CH})$    | 2840–2870, $\nu_{\text{s}}(\text{CH}_2)$  | 2905, $\nu(\text{CH})$                                  |
|                                      | 2750–2765, $2\nu_{\text{w}}(\text{CH}_2)$ | 2750, $\nu_{\text{s}}(\text{OCO}) + \delta(\text{CH})$  |
|                                      |                                           | 1595, $\nu_{\text{as}}(\text{OCO})$                     |

**Detailed explanation for *in situ* DRIFTS spectra.** For the DRIFTS spectrum of Al<sub>2</sub>O<sub>3</sub>, the adsorbed species was determined to be formate because the peaks at 2997, 2907, and 1572 cm<sup>-1</sup> were consistent with those of formate ions adsorbed on Al<sub>2</sub>O<sub>3</sub>. In the case of the DRIFTS spectrum of SiO<sub>2</sub>, the adsorbed species corresponding to 2959 and 2858 cm<sup>-1</sup> were determined through a process of elimination. Seven possible adsorbed species and their reported attributions were presented in Table S2. Firstly, formaldehyde, formate, and carbon monoxide were eliminated due to the absence of peaks in the range of 1500–2500 cm<sup>-1</sup>, where their characteristic peaks derived from  $\nu(\text{CO})$ ,  $\nu_{\text{as}}(\text{OCO})$ , or  $\nu(\text{CO})$  appeared. Subsequently, polyoxymethylene and methoxide were excluded because there were no specific peaks consistent with the observed peaks. Finally, methanol was eliminated for two reasons: the absence of the peak derived from  $\nu(\text{OH})$  around 3370 cm<sup>-1</sup>, and the assumption that methanol would hardly remain on SiO<sub>2</sub> at 600 °C under vacuum. Consequently, we concluded that the remaining species, dioxymethylene, could be attributed to the peaks at 2959 and 2858 cm<sup>-1</sup>.

## Supporting Figures

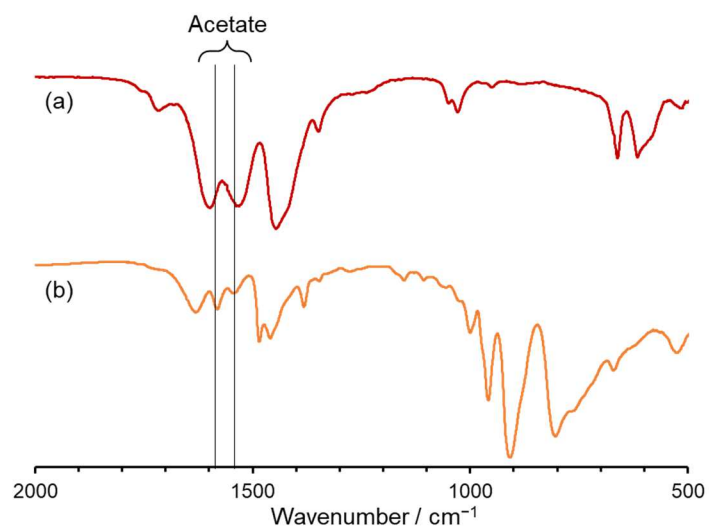

Fig. S1 IR spectra of (a)  $\text{Fe}_3\text{O}(\text{CH}_3\text{CO}_2)_7(\text{H}_2\text{O})$  and (b) **Fe4**.

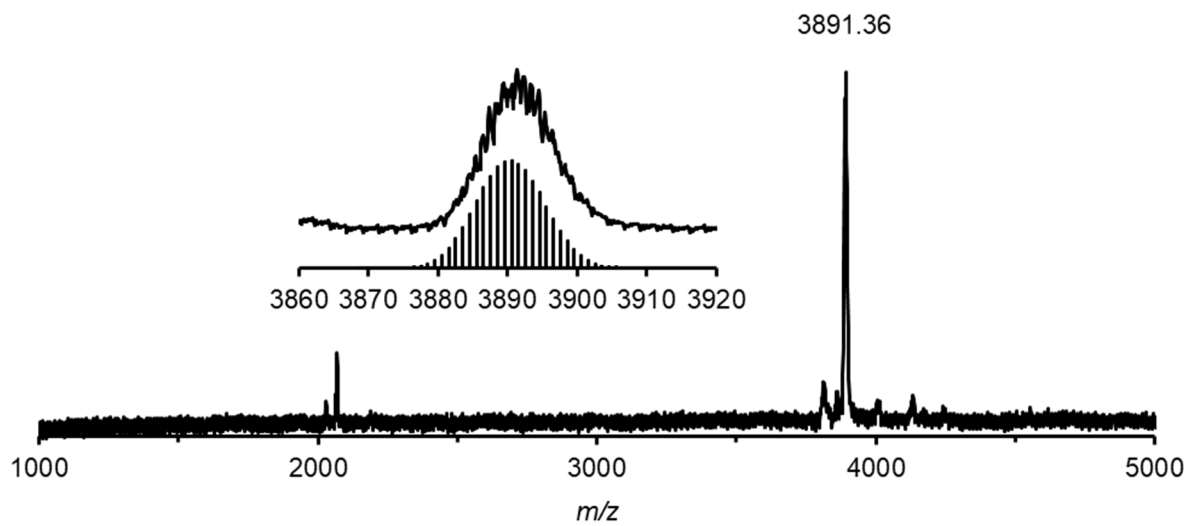

Fig. S2 Positive-ion CSI-mass spectrum of Fe<sub>4</sub> in acetonitrile. Inset: spectrum in the range of  $m/z$  3860–3920, and a simulated pattern for [TBA<sub>5</sub>Fe<sub>4</sub>(OH)<sub>3</sub>(CH<sub>3</sub>CO<sub>2</sub>)<sub>3</sub>SiW<sub>9</sub>O<sub>34</sub>]<sup>+</sup> (theoretical  $m/z$ : 3890.48).

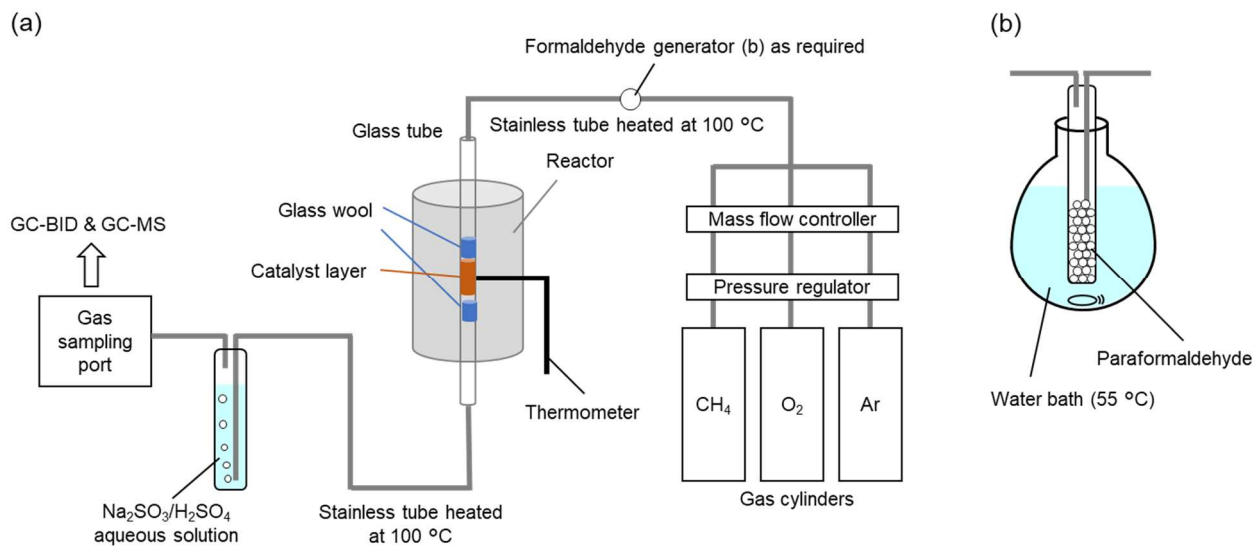

Fig. S3 Schematic image of an experimental apparatus: (a) overall image and (b) formaldehyde generator.

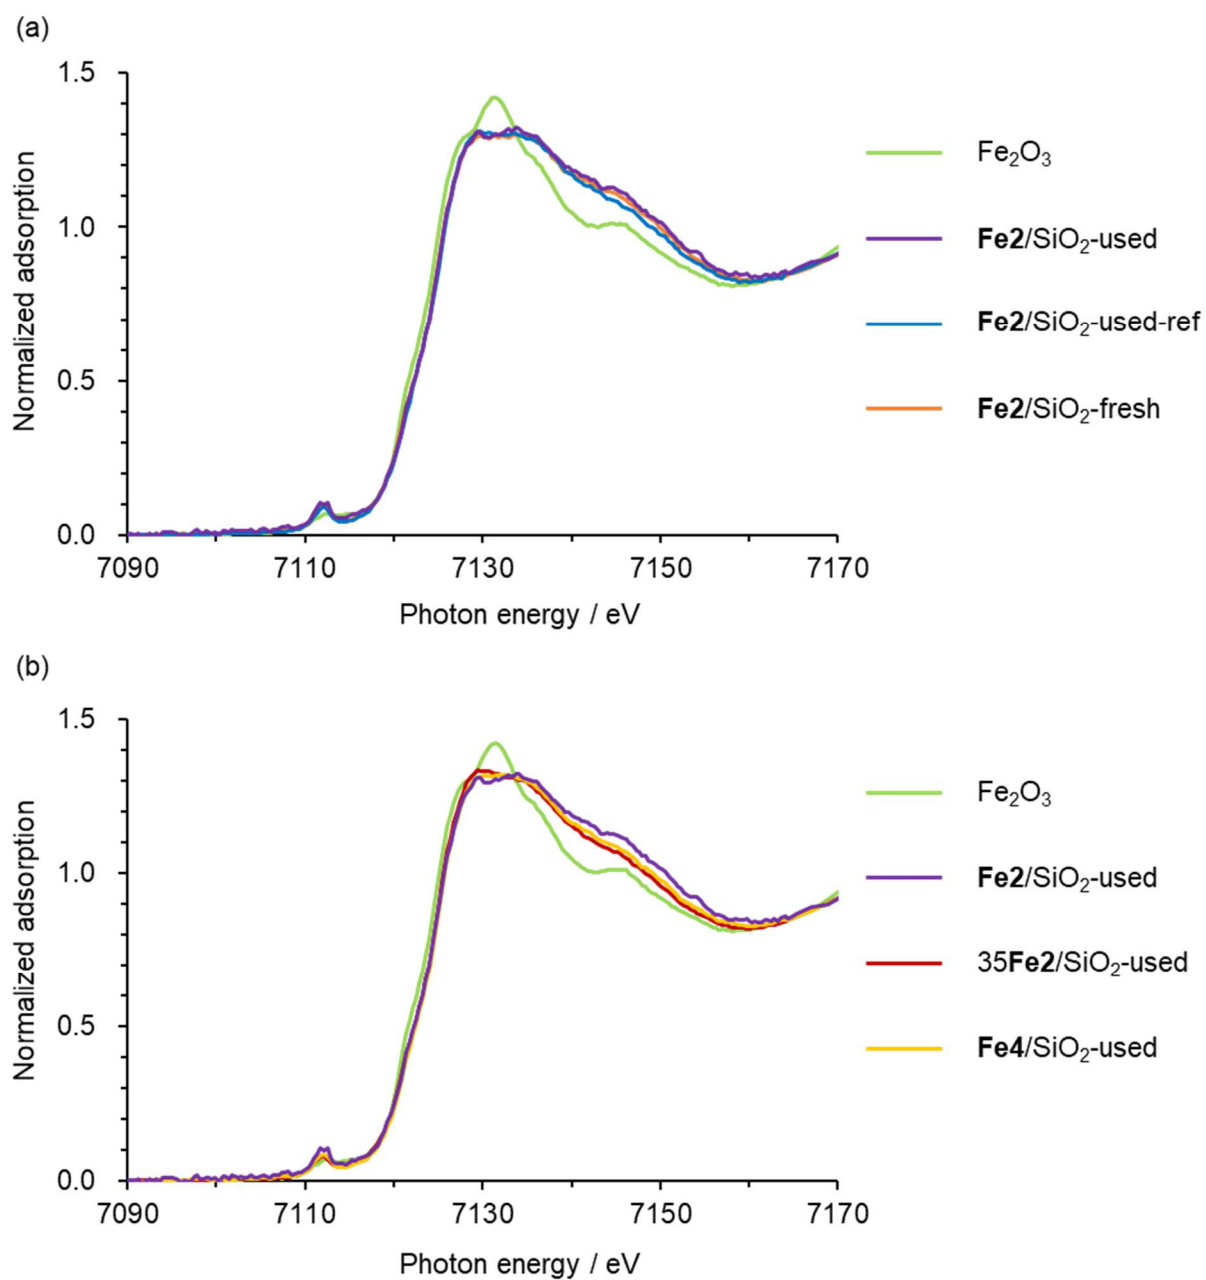

Fig. S4 Fe K-edge XANES spectra of various catalysts before and after the reaction. The reaction conditions were indicated in Table 1. The Fe K-edge XANES spectrum of **Fe2/SiO<sub>2</sub>-used-ref** was the same as previously reported.<sup>S5</sup>



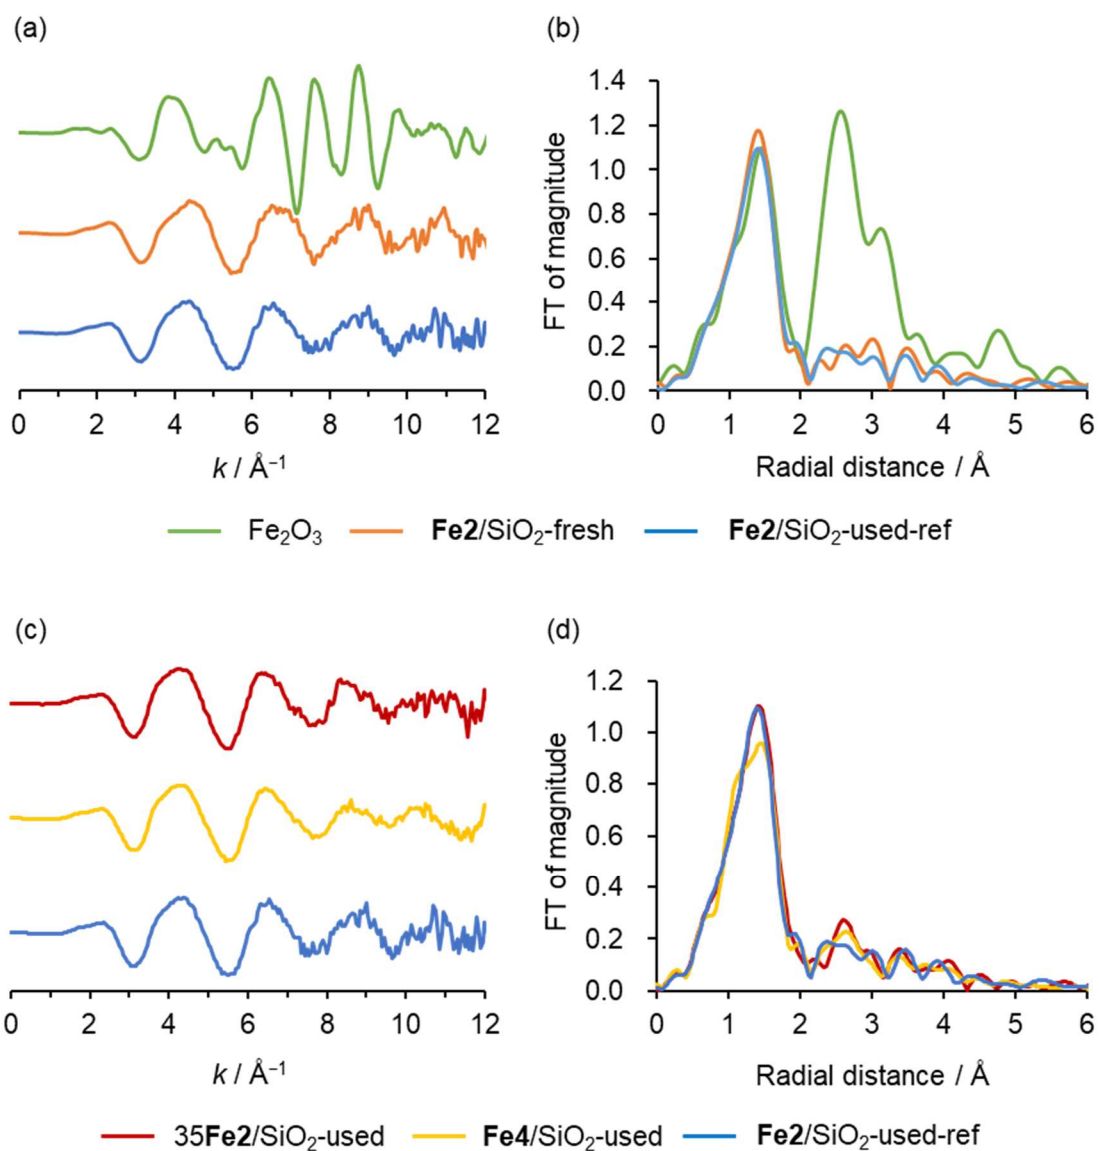

Fig. S5  $k^3$ -weighted (a) Fe K-edge EXAFS oscillation and (b) Fourier-transformed Fe K-edge EXAFS spectra ( $k = 3\text{--}12 \text{\AA}^{-1}$ ) of  $\text{Fe}_2/\text{SiO}_2$  before and after the reaction. The Fe K-edge EXAFS spectra of  $\text{Fe}_2/\text{SiO}_2$ -used-ref were shown in the previous paper.<sup>S5</sup> (c) Fe K-edge EXAFS oscillation and (d) Fourier-transformed Fe K-edge EXAFS spectra ( $k = 3\text{--}12 \text{\AA}^{-1}$ ) of  $^{35}\text{Fe}_2/\text{SiO}_2$  and  $\text{Fe}_4/\text{SiO}_2$  catalysts after the reaction.

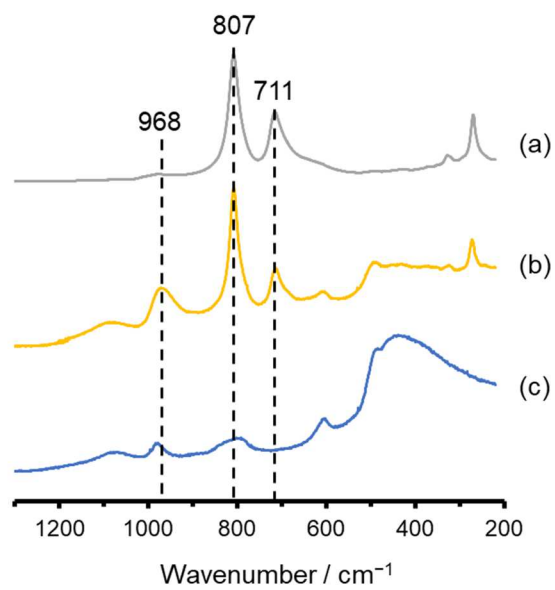

Fig. S6 Raman spectra of (a) **Fe4**/SiO<sub>2</sub>-used, (b) **Fe2**/SiO<sub>2</sub>-used, and (c) SiO<sub>2</sub>.

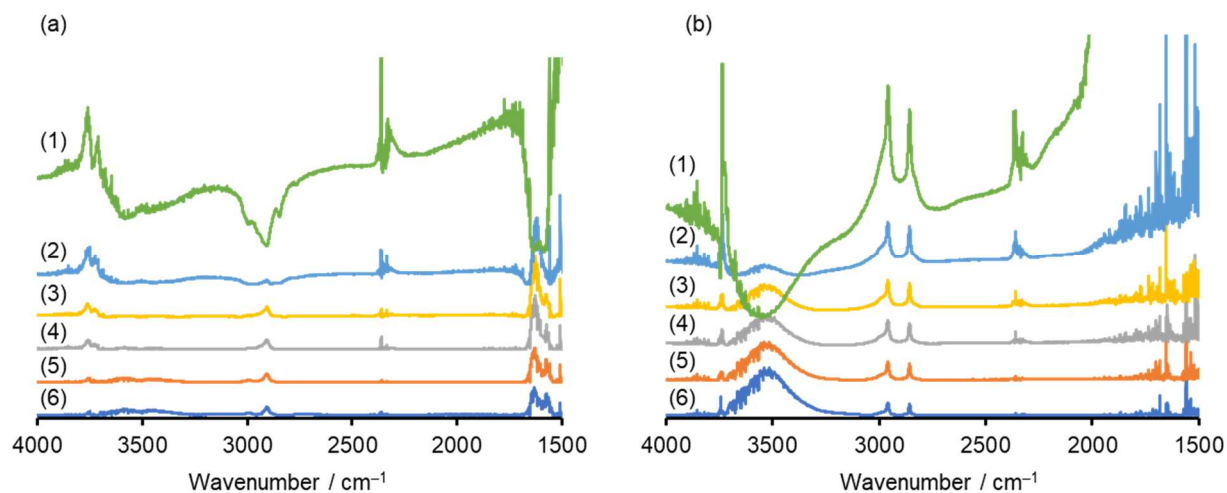

Fig. S7 Time variation of *in situ* DRIFTS spectra of (a)  $\text{Al}_2\text{O}_3$  and (b)  $\text{SiO}_2$ . Analytic conditions: 600 °C, Gas:  $\text{N}_2$  (20  $\text{mL min}^{-1}$ ) + HCHO (generated from paraformaldehyde at 55 °C). (1) 60 min after HCHO/ $\text{N}_2$  flow; (2) *in vacuo*, 0 min; (3) *in vacuo*, 5 min; (4) *in vacuo*, 10 min; (5) *in vacuo*, 30 min; (6) *in vacuo*, 60 min. The absorbance intensities on the vertical axis are Kubelka–Munk-transformed.

**Reference:**

- S1 J.W. Cook Jr. and D.E. Sayers, *J. Appl. Phys.*, 1981, **52**, 5024–5031.
- S2 D. B. Clarke, D. K. Lee, M. J. Sandoval and A. T. Bell, *J. Catal.*, 1994, **150**, 81–93.
- S3 S. Kattel, B. Yan, Y. Yang, J. G. Chen and P. Liu, *J. Am. Chem. Soc.*, 2016, **138**, 12440–12450.
- S4 G. Busca, J. Lamotte, J.-C. Lavalley and V. Lorenzelli, *J. Am. Chem. Soc.*, 1987, **109**, 5197–5202.
- S5 K. Wachi, T. Yabe, T. Suzuki, K. Yonesato, K. Suzuki and K. Yamaguchi, *Appl. Catal. B*, 2022, **314**, 121420.
